# Supplementary material
Source: publisher site journal article supplement (https://www.dovepress.com/get_supplementary_file.php?f=298678.docx)
Supplement: Supplementary file 1 [file get_supplementary_file.php]

| **Metabolite [pg/ml]**  **median (IQR)**  **method**  **LLOQ** | **Exacerbators**  **(n=42)** | **Non-exacerbators**  **(n=34)** | **P** |
| --- | --- | --- | --- |
| **LTE4**  HPLC-MS/MS  3.22 | 48 (17.3-106.2) | 45.6 (22-68.6) | NS |
| **LTD4**  HPLC-MS/MS  2.85 | 20.5 (4.6-78.6) | 17.3 (9-29) | NS |
| **LTB4**  HPLC-MS/MS  2.96 | 260.4 (69.5-656) | 323.8 (81-896) | NS |
| **PGE2**  GC-MS  1.62 | 101.8 (43.1-391.9) | 74 (29.1-121.7) | NS |
| **Tetranor-PGE-M**  HPLC-MS/MS  1.45 | 4.1 (3.1-6.6) | 4.7 (3.4-5.9) | NS |
| **PGA2**  HPLC-MS/MS  12 | 10.4 (6.7-19.5) | 15.3 (10.3-24) | NS |
| **PGD2**  GC-MS  2.09 | 51 (25.9-120) | 25.2 (19.1-55.8) | 0.025 |
| **Tetranor-PGD-M**  HPLC-MS/MS  1.55 | 1.8 (1.3-2.3) | 1.9 (1.3-2.7) | NS |
| **8-izo-PGE2**  GC-MS  1.65 | 25.6 (11.6-45.1) | 16.4 (11.9-24.4) | NS |
| **8-izo-PGF2a**  GC-MS  0.63 | 11.9 (5.2-47.5) | 22.5 (11.2-76.8) | NS |
| **5-HETE**  HPLC-MS/MS  0.82 | 520.2 (273.8-1554.8) | 362.2 (222.1-1088.6) | NS |
| **5-oxo-ETE**  HPLC-MS/MS  5.3 | 160.8 (51-361) | 75.8 (20.2-163.1) | 0.041 |
| **12-HETE**  HPLC-MS/MS  0.63 | 1267.9 (702.7-2240.8) | 1124.1 (565.2-1531.2) | NS |
| **12-oxo-ETE**  HPLC-MS/MS  10 | 320.9 (126.1-557.1) | 117.1 (78.7-238.7 | 0.022 |
| **15-HETE**  HPLC-MS/MS  2.16 | 605.5 (149.7-935.8) | 367.7 (150.7-1061) | NS |
| **15-oxo-ETE**  HPLC-MS/MS  5 | 129.5 (71.4261.8) | 98 (55.8-234.1) | NS |
| **11-dehydro-TBX2**  HPLC-MS/MS  1.84 | 27.2 (14-86.6) | 26 (15.8-38.4) | NS |

**Supplementary Table 1** Concentrations of eicosanoids in induced sputum in COPD subjects experiencing any exacerbation in 12 months and subjects free from exacerbation

**Abbreviations:** NS, not significant; COPD, chronic obstructive pulmonary disease; HC, healthy controls; GC-MS, gas chromatography/mass spectrometry; HPLC-MS/MS, high-performance liquid chromatography/tandem mass spectrometry; LLOQ, lowest limit of quantification; LTE4, leukotriene E4; LTD4,leukotriene D4; LTB4,leukotriene B4; PGE2, prostaglandin E2; PGD2, prostaglandin D2; PGA2, prostaglandin A2; tetranor-PGE-M, tetranor-prostaglandin E metabolite; tetranor-PGD-M, tetranor-prostaglandin D metabolite; 8-iso-PGE2, 8-iso-prostagladnin E2; 8-iso-PGF2a, 8-iso-prostagladnin F2a, 5-HETE, 5-hydroxyeicosatetraenoic acid; 5-oxo-ETE, 5-oxo-eicosatetraenoic acid; 12-HETE, 12-hydroxyeicosatetraenoic acid; 12-oxo-ETE, 12-oxo-eicosatetraenoic acid; 15-HETE, 15-hydroxyeicosatetraenoic acid; 15-oxo-ETE, 15-oxo-eicosatetraenoic acid; 11-dehydro-TBX2, 11-dehydro-thromboxane B2

| **Metabolite [pg/ml]**  **median (IQR)**  **method**  **LLOQ** | **Pure COPD**  **(n=59)** | **ACO**  **(n=17)** | **P** |
| --- | --- | --- | --- |
| **LTE4**  HPLC-MS/MS  3.22 | 49.8 (17.3-101.1) | 31.3 (20.5-60.4) | NS |
| **LTD4**  HPLC-MS/MS  2.85 | 18.1 (6.5-56) | 14.5 (6.8-55.6) | NS |
| **LTB4**  HPLC-MS/MS  2.96 | 331.1 (73.7-1155.1) | 243.1 (106.2-356.7) | NS |
| **PGE2**  GC-MS  1.62 | 87 (33.2-254.1) | 86.4 (41.3-183.8) | NS |
| **Tetranor-PGE-M**  HPLC-MS/MS  1.45 | 4.2 (3.1-5.9) | 4.9 (3.6-8.9) | NS |
| **PGA2**  HPLC-MS/MS  12 | 14.4 (8.8-23) | 11.3 (5.8-22) | NS |
| **PGD2**  GC-MS  2.09 | 39.6 (19.1-77.2) | 36.6 (21.3-88.4) | NS |
| **Tetranor-PGD-M**  HPLC-MS/MS  1.55 | 1.8 (1.3-2.7) | 2.1 (1.2-2.3) | NS |
| **8-izo-PGE2**  GC-MS  1.65 | 18.5 (10.5-39.5) | 17.3 (15.2-36.3) | NS |
| **8-izo-PGF2a**  GC-MS  0.63 | 17.3 (6.6-56.6) | 29.8 (4.4-50) | NS |
| **5-HETE**  HPLC-MS/MS  0.82 | 466.5 (236.2-1388.5) | 350.3 (263.4-2725.3) | NS |
| **5-oxo-ETE**  HPLC-MS/MS  5.3 | 202.2 (30.5-309) | 63.1 (29.9-402.3) | NS |
| **12-HETE**  HPLC-MS/MS  0.63 | 1205.5 (579.3-2065.4) | 1286.4 (850-2226.8) | NS |
| **12-oxo-ETE**  HPLC-MS/MS  10 | 203.5 (87.1-511.9) | 148.1 (90.7-501.7) | NS |
| **15-HETE**  HPLC-MS/MS  2.16 | 618.1 (149.7-1122.5) | 273.4 (237.9-493.6) | NS |
| **15-oxo-ETE**  HPLC-MS/MS  5 | 110.6 (61.2-234.1) | 133.6 (62-247.9) | NS |
| **11-dehydro-TBX2**  HPLC-MS/MS  1.84 | 26 (15.5-49) | 26.8 (37.1-151.1) | NS |

**Supplementary Table 2** Concentrations of eicosanoids in induced sputum in pure COPD subjects and ACO subjects

**Abbreviations:** NS, not significant; COPD, chronic obstructive pulmonary disease; HC, healthy controls; GC-MS, gas chromatography/mass spectrometry; HPLC-MS/MS, high-performance liquid chromatography/tandem mass spectrometry; LLOQ, lowest limit of quantification; LTE4, leukotriene E4; LTD4,leukotriene D4; LTB4,leukotriene B4; PGE2, prostaglandin E2; PGD2, prostaglandin D2; PGA2, prostaglandin A2; tetranor-PGE-M, tetranor-prostaglandin E metabolite; tetranor-PGD-M, tetranor-prostaglandin D metabolite; 8-iso-PGE2, 8-iso-prostagladnin E2; 8-iso-PGF2a, 8-iso-prostagladnin F2a, 5-HETE, 5-hydroxyeicosatetraenoic acid; 5-oxo-ETE, 5-oxo-eicosatetraenoic acid; 12-HETE, 12-hydroxyeicosatetraenoic acid; 12-oxo-ETE, 12-oxo-eicosatetraenoic acid; 15-HETE, 15-hydroxyeicosatetraenoic acid; 15-oxo-ETE, 15-oxo-eicosatetraenoic acid; 11-dehydro-TBX2, 11-dehydro-thromboxane B2
